# Supplementary material for: An Atlas for Schistosoma mansoni Organs and Life-Cycle Stages Using Cell Type-Specific Markers and Confocal Microscopy
Source: PLoS Negl Trop Dis. 2011 Mar 8;5(3):e1009. doi: 10.1371/journal.pntd.0001009 (PMC3050934; doi:10.1371/journal.pntd.0001009)
Supplement: Table S1 — Reagents used in this study and their labeling patterns in Schistosoma mansoni. (PDF) [file pntd.0001009.s008.pdf]

Table S1. Reagents used in this study and their labeling patterns in *Schistosoma mansoni*.

| Reagent                                           | Reagent Type                      | Source                               | Dilution from stock | Proteinase K treatment | Cercariae                                                                                                                                    | Miracidia                                                                                   | Adults                                                                                                   |
|---------------------------------------------------|-----------------------------------|--------------------------------------|---------------------|------------------------|----------------------------------------------------------------------------------------------------------------------------------------------|---------------------------------------------------------------------------------------------|----------------------------------------------------------------------------------------------------------|
| Anti-acetylated $\alpha$ -tubulin (Clone 6-11B-1) | Mouse Mono-clonal antibody        | Santa Cruz                           | 1:500               | +                      | Sensory cilia, flame cells, microtubular network of acetabular glands                                                                        | Flame cells, cilia of epidermal plates, sensory cilia                                       | Flame cells, protonephridial collecting ducts, sperm                                                     |
| Anti- $\beta$ -tubulin (Clone E7)                 | Mouse Mono-clonal antibody        | Developmental studies hybridoma bank | 1:500               | + or -                 | Sensory Cilia*, neural projections of tail*, flame cells and ciliated protonephridial ducts                                                  | Flame cells, cilia of epidermal plates*, Sensory cilia*, microtubular network of germballs* | ND                                                                                                       |
| Anti- $\epsilon$ -tubulin (Clone TUB-11)          | Mouse Mono-clonal antibody        | Sigma                                | 1:500               | +                      | weak CNS (neuropil), sensory cilia, flame cells, subset of nuclei in tail                                                                    | ND                                                                                          | ND                                                                                                       |
| Anti-phospho S/T                                  | Mixed mouse Monoclonal antibodies | Upstate (Cat. No. 44-006)            | 1:500               | -                      | Longitudinal muscles of tail, weak CNS (neuropil of cephalic ganglia), flame cell (ciliary rootlets), most nuclei (not germ cell precursors) | Weak muscle, most nuclei, flame cell (ciliary rootlets),                                    | ND                                                                                                       |
| Anti-phospho Y (P-Tyr-100)                        | Mouse Mono-clonal antibody        | Cell Signaling                       | 1:500               | +                      | moderate CNS (neuropil of cephalic ganglia and cords), flame cells, protonephridial duct in tail, acetabular glands                          | ND                                                                                          | ND                                                                                                       |
| Anti-Synapsin (Clone 3C11)                        | Mouse Mono-clonal antibody        | Developmental studies hybridoma bank | 1:50                | -                      | CNS (Neuropil of cephalic ganglia and cords)                                                                                                 | CNS (neuropil of cephalic ganglia and cords)                                                | ND                                                                                                       |
| <i>Erythrina chistagalli</i> lectin (ECL)         | Lectin                            | Vector Laboratories                  | 1:500               | +/-                    | Post-acetabular glands/ducts (periphery), pre-acetabular glands (weak, blotchy)                                                              | Lateral glands, weak anterior gland                                                         | ND                                                                                                       |
| <i>Griffonia simplicifolia</i> lectin I (GSLI)    | Lectin                            | Vector Laboratories                  | 1:500               | +/-                    | Post-acetabular glands/ducts (periphery), pre-acetabular glands (weak)                                                                       | Weak lateral glands                                                                         | ND                                                                                                       |
| <i>Griffonia simplicifolia</i> lectin II (GSLII)  | Lectin                            | Vector Laboratories                  | 1:500               | -                      | Post-acetabular glands/ducts (periphery), head gland, protonephridial duct                                                                   | Lateral glands                                                                              | ND                                                                                                       |
| Jacalin                                           | Lectin                            | Vector Laboratories                  | 1:500               | -                      | Pre- and post-acetabular glands, flame cell caps, weak protonephridial ducts                                                                 | Lateral glands                                                                              | ND                                                                                                       |
| <i>Lens culinaris</i> lectin (LCA)                | Lectin                            | Vector Laboratories                  | 1:500               | +/-                    | Pre- and post-acetabular glands/ducts, ECM (e.g. basement membrane, esophagus, flame cell)                                                   | Weak lateral glands                                                                         | ND                                                                                                       |
| <i>Lycopersicon esuleatum</i> lectin (LEL)        | Lectin                            | Vector Laboratories                  | 1:500               | +/-                    | Post-acetabular glands/ducts, flame cell, protonephridial ducts ECM/BM                                                                       | Lateral glands                                                                              | ND                                                                                                       |
| Peanut Agglutinin (PNA)                           | Lectin                            | Vector Laboratories                  | 1:500               | +                      | Glycocalyx/tegument, post-acetabular, glands/ducts (periphery)<br>Pre-acetabular glands/ducts, ECM of flame cell                             | Lateral glands                                                                              | Mehlis' Gland, esophageal gland, vitellaria, weak basement membrane, weak labeling at base of flame cell |
| <i>Pisum sativum</i> Agglutinin (PSA)             | Lectin                            | Vector Laboratories                  | 1:500               | +/-                    | ECM (e.g. basement membrane, esophagus, flame cell), post-acetabular glands/ducts (central), neuropil                                        | Weak lateral gland                                                                          | ND                                                                                                       |
| <i>Ricinus communis</i> Agglutinin I (RCA)        | Lectin                            | Vector Laboratories                  | 1:500               | +/-                    | Post-acetabular glands/ducts (periphery), Pre-acetabular glands                                                                              | Weak lateral gland                                                                          | ND                                                                                                       |
| Soybean Agglutinin (SBA)                          | Lectin                            | Vector Laboratories                  | 1:500               | +/-                    | Post-acetabular glands/ducts, pre-acetabular glands                                                                                          | Lateral glands                                                                              | ND                                                                                                       |
| <i>Sophora japonica</i> Agglutinin (SJA)          | Lectin                            | Vector Laboratories                  | 1:500               | +/-                    | Post-acetabular glands/ducts, weak pre-acetabular glands                                                                                     | Weak lateral glands                                                                         | ND                                                                                                       |

|                                                 |        |                        |       |     |                                                                                                                       |                                     |                                                                                                                                             |
|-------------------------------------------------|--------|------------------------|-------|-----|-----------------------------------------------------------------------------------------------------------------------|-------------------------------------|---------------------------------------------------------------------------------------------------------------------------------------------|
| <i>Solanum tuberosum</i><br>Lectin (STL)        | Lectin | Vector<br>Laboratories | 1:500 | +/- | Post-acetabular glands, weak pre-acetabular glands, head gland, weak basement membrane                                | Weak lateral glands                 | ND                                                                                                                                          |
| Succinylated Wheat<br>Germ Agglutinin<br>(sWGA) | Lectin | Vector<br>Laboratories | 1:500 | +   | Post-acetabular glands/ducts, pre-acetabular glands, glycocalyx/tegument, neuropil, protonephridial ducts, head gland | Lateral glands                      | Unciliated (strong) and ciliated (weak) protonephridial ducts, ECM of many cells, ootype, male tubercles, basement membrane, brain neuropil |
| <i>Ulex europaeus</i><br>Agglutinin I (UEA I)   | Lectin | Vector<br>Laboratories | 1:500 | +/- | Tegument between actin spines, post-acetabular glands/ducts, weak pre-acetabular glands, head gland                   | Weak lateral glands                 | ND                                                                                                                                          |
| <i>Vicia villosa</i> Lectin<br>(VVL)            | Lectin | Vector<br>Laboratories | 1:500 | +/- | Post-acetabular Glands                                                                                                | Lateral glands, weak anterior gland | ND                                                                                                                                          |
| Wheat Germ<br>Agglutinin (WGA)                  | Lectin | Vector<br>Laboratories | 1:500 | +   | Post-acetabular glands/ducts, weak pre-acetabular glands, basement membrane, neuropil, head gland                     | Lateral glands                      | ND                                                                                                                                          |

\*Indicates which staining patterns were specifically observed when Proteinase K was omitted.
